# Supplementary material for: Pt2CeO2 Heterojunction Supported on Multiwalled Carbon Nanotubes for Robust Electrocatalytic Oxidation of Methanol
Source: MDPI journal article supplement (doi:10.3390/molecules28072995), 2023-03-27
Supplement: s1 [file s1]

Article

# Pt<sub>2</sub>CeO<sub>2</sub> Heterojunction Supported on Multiwalled Carbon Nanotubes for Robust Electrocatalytic Oxidation of Methanol

Pingping Yang <sup>1,2</sup>, Xuejiao Wei <sup>1,\*</sup>, Li Zhang <sup>1</sup>, Shiming Dong <sup>1</sup>, Wenting Cao <sup>1</sup>, Dong Ma <sup>1</sup> and Yuejun Ouyang <sup>1,2,\*</sup>

<sup>1</sup> College of Chemistry and Materials Engineering, Huaihua University, Huaihua 418008, China

<sup>2</sup> Hunan Engineering Research Center for Recycled Aluminum Huaihua University, Huaihua 418008, China

\* Correspondence: wei1348137@163.com (X.W.); oyyj0816@163.com (Y.O.)

## Table of Contents:

Supplementary Figures

**Figure S1.** XRD patterns of Pt<sub>2</sub>CeO<sub>2</sub>/CNTs-300 and Pt<sub>2</sub>CeO<sub>2</sub>/CNTs-500 catalysts.

**Figure S2.** TEM and HRTEM images of Pt<sub>2</sub>CeO<sub>2</sub>/CNTs.

**Figure S3.** TEM and HRTEM images of Pt<sub>2</sub>CeO<sub>2</sub>/CNTs-300 (a, b) and Pt<sub>2</sub>CeO<sub>2</sub>/CNTs-500 (c, d) catalysts.

**Figure S4.** EDS of Pt<sub>2</sub>CeO<sub>2</sub>/CNTs-400.

**Figure S5.** Ce3d spectra (locally enlarged) of Pt<sub>2</sub>CeO<sub>2</sub>/CNTs-400 and Pt<sub>2</sub>CeO<sub>2</sub>/CNTs.

**Figure S6.** XPS survey spectra, Ce (3d) spectrum; Pt (3d) spectrum of Pt<sub>2</sub>CeO<sub>2</sub>/CNTs-300, Pt<sub>2</sub>CeO<sub>2</sub>/CNTs-500.

**Figure S7.** accelerated degradation tests (ADT) CV curves of Pt<sub>2</sub>CeO<sub>2</sub>/CNTs-400 (a), Pt<sub>2</sub>CeO<sub>2</sub>/CNTs (b), Pt/C(c) catalysts in 0.5 M H<sub>2</sub>SO<sub>4</sub> +0.5 M CH<sub>3</sub>OH solution (100th, 200th, 400th and 500th cycles).

**Table S1** a recent literatures survey of the activity (mA mg<sup>-1</sup> Pt ) of MOR electrocatalysts.

Supplementary References

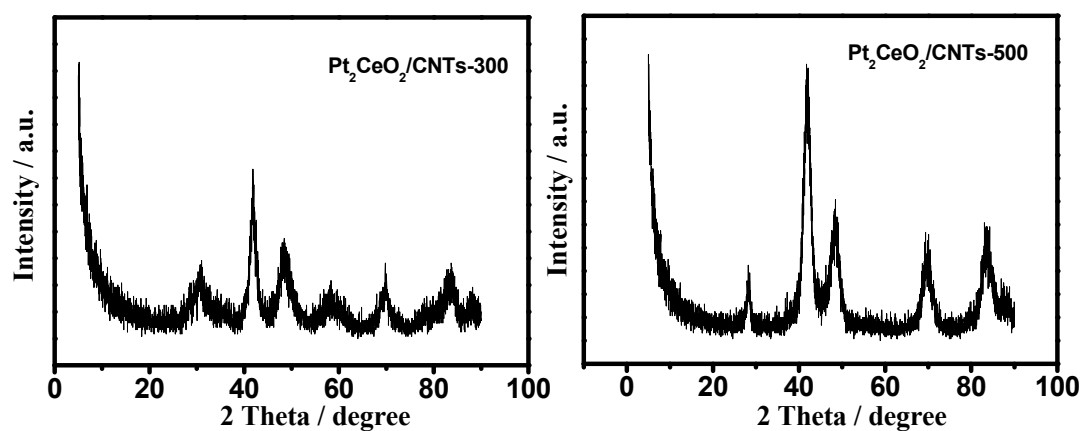

Figure S1. XRD patterns of Pt<sub>2</sub>CeO<sub>2</sub>/CNTs-300 and Pt<sub>2</sub>CeO<sub>2</sub>/CNTs-500 catalysts.

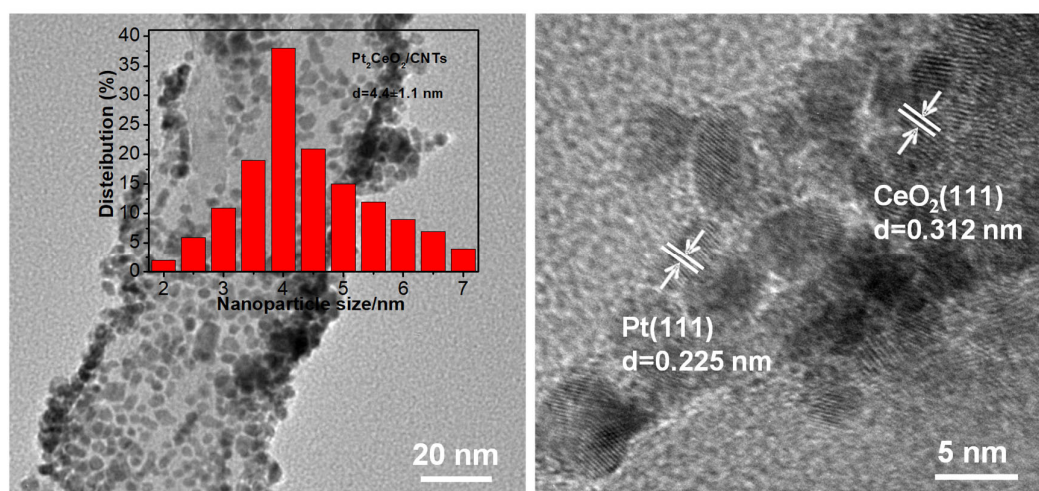

Figure S2. TEM and HRTEM images of Pt<sub>2</sub>CeO<sub>2</sub>/CNTs catalyst.

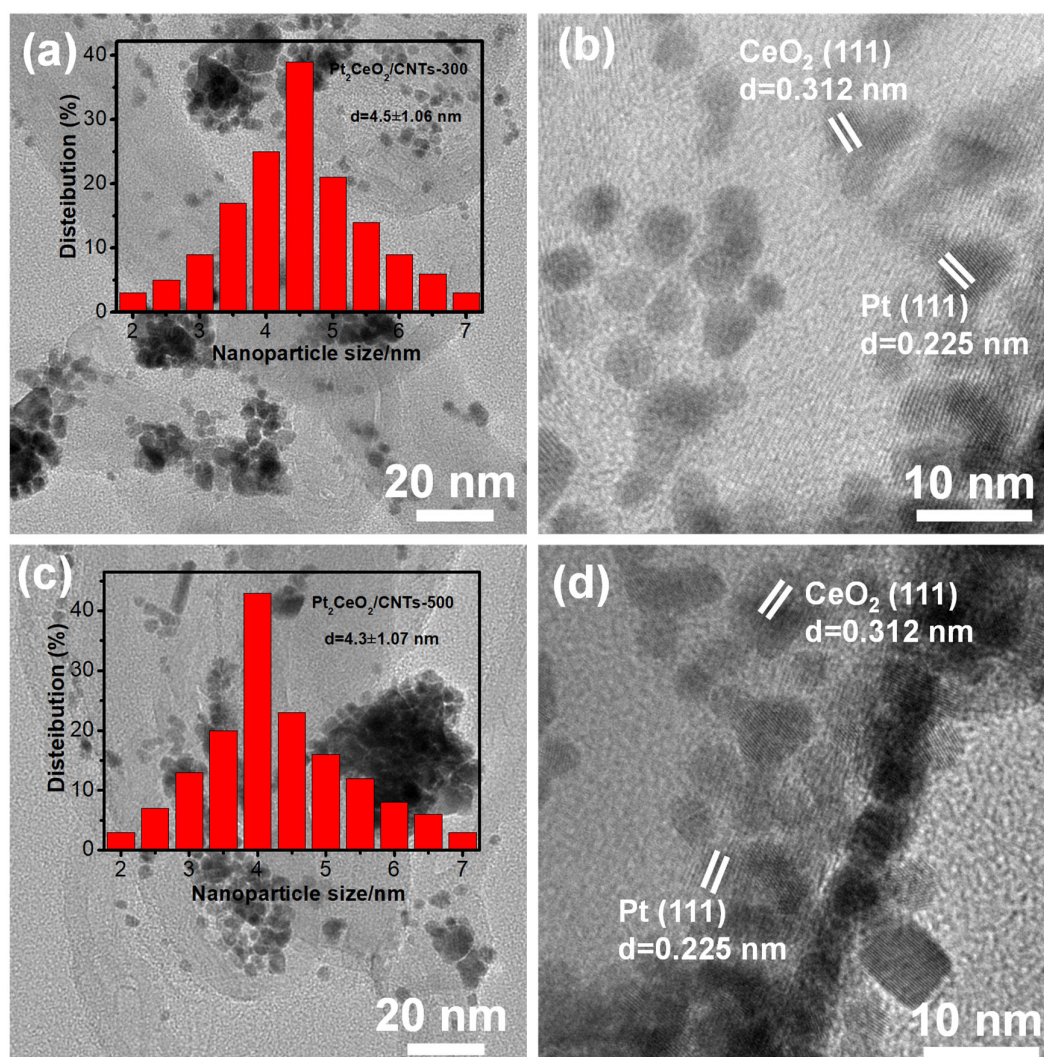

**Figure S3.** TEM and HRTEM images of Pt<sub>2</sub>CeO<sub>2</sub>/CNTs-300 (a, b) and Pt<sub>2</sub>CeO<sub>2</sub>/CNTs-500 (c, d) catalysts.

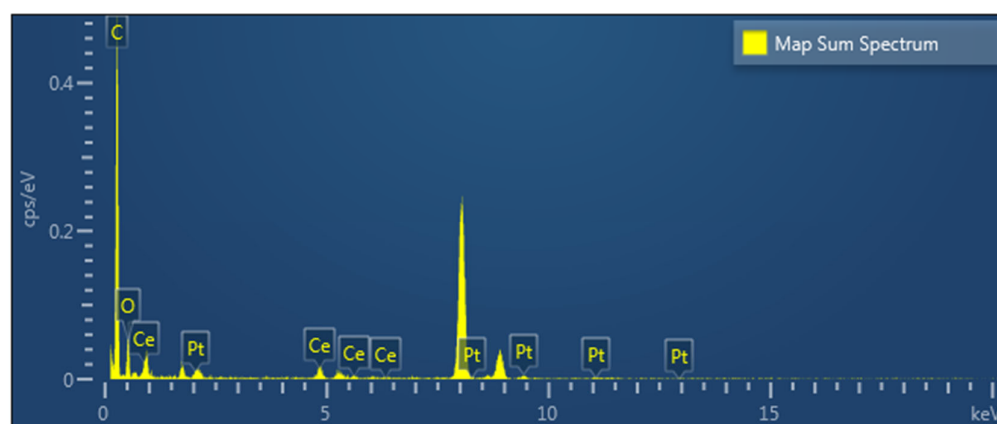

**Figure S4.** EDS of Pt<sub>2</sub>CeO<sub>2</sub>/CNTs-400.

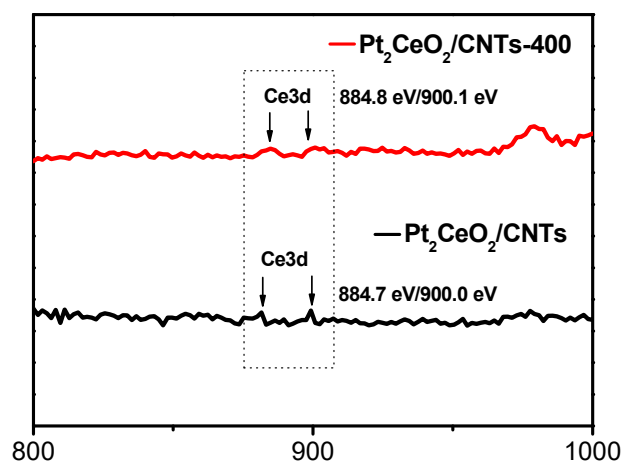

Figure S5. Ce3d spectra (locally enlarged) of  $\text{Pt}_2\text{CeO}_2/\text{CNTs-400}$  and  $\text{Pt}_2\text{CeO}_2/\text{CNTs}$ .

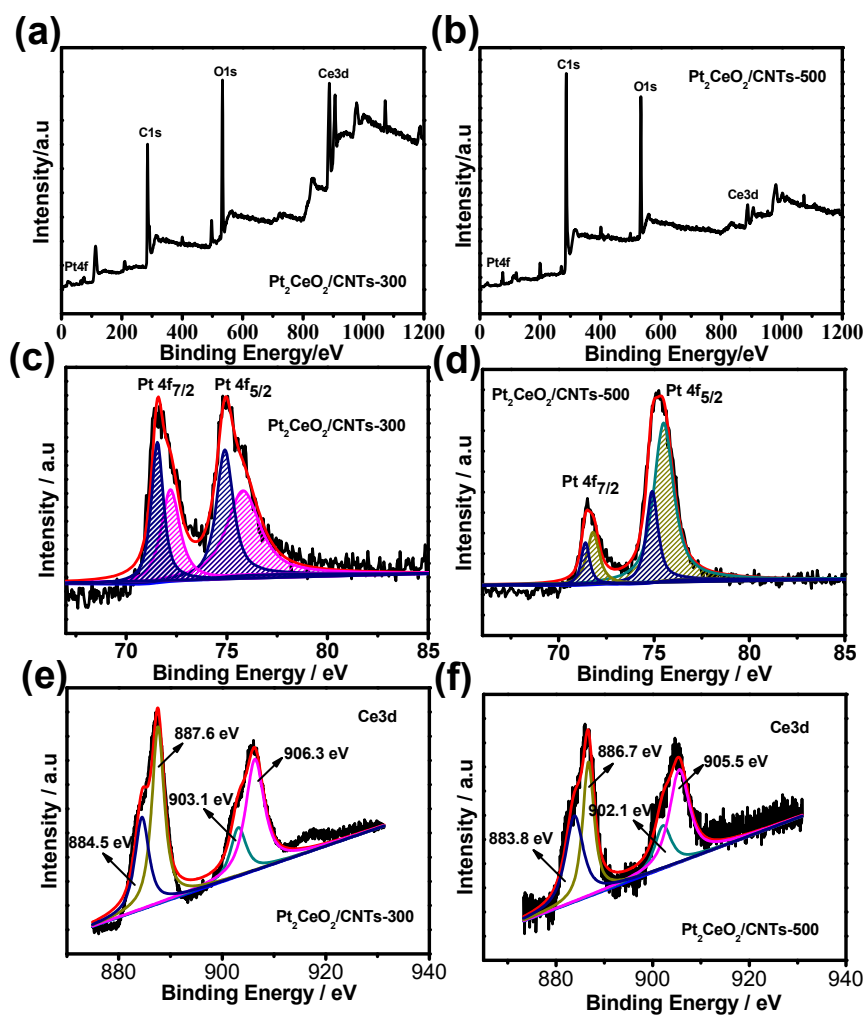

Figure S6. XPS survey spectra, Ce (3d) spectrum; Pt (3d) spectrum of  $\text{Pt}_2\text{CeO}_2/\text{CNTs-300}$ ,  $\text{Pt}_2\text{CeO}_2/\text{CNTs-500}$ .

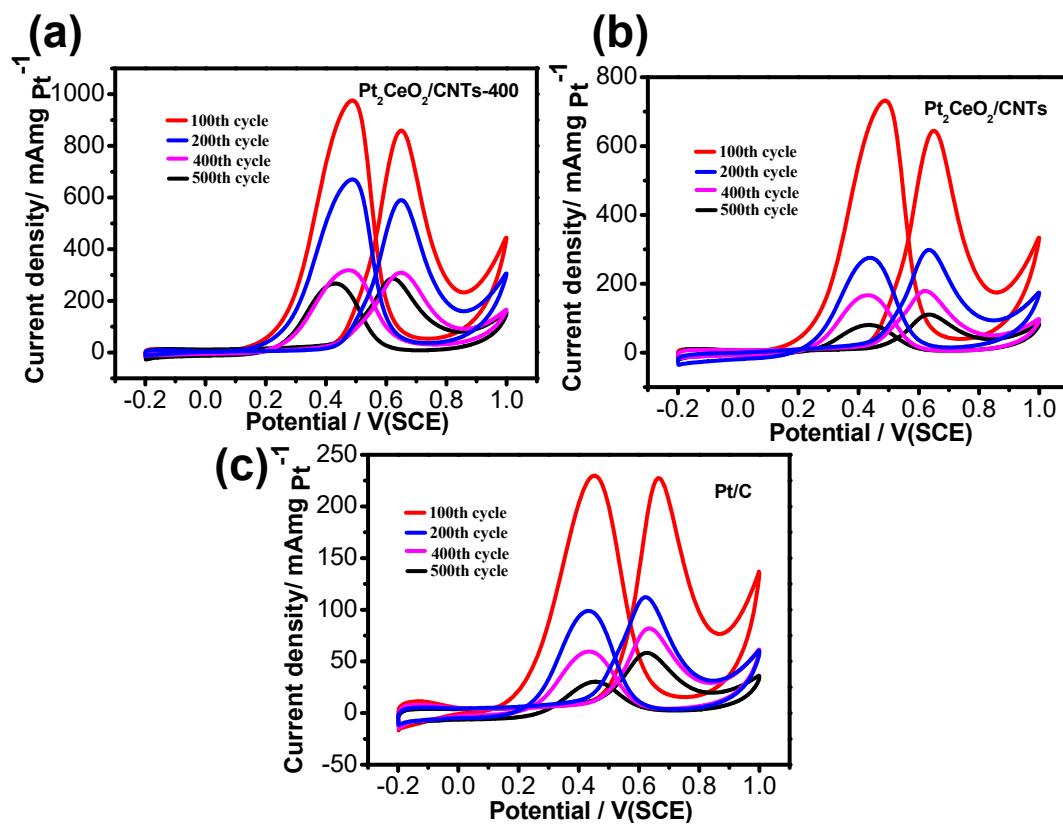

**Figure S7.** accelerated degradation tests (ADT) CV curves of Pt<sub>2</sub>CeO<sub>2</sub>/CNTs-400 (a), Pt<sub>2</sub>CeO<sub>2</sub>/CNTs (b), Pt/C (c) catalysts in 0.5 M H<sub>2</sub>SO<sub>4</sub> + 0.5 M CH<sub>3</sub>OH solution (100th, 200th, 400th and 500th cycles).

**Table S1.** a recent literatures survey of the activity (mA mg<sup>-1</sup> Pt) of MOR electrocatalysts.

| Catalysts                                                    | Supporting electrolyte                   | Mass activity | Scan rate                   | Methanol concentration        | References       |
|--------------------------------------------------------------|------------------------------------------|---------------|-----------------------------|-------------------------------|------------------|
| <b>Pt<sub>2</sub>CeO<sub>2</sub>/CNTs-400</b>                | <b>0.5 M H<sub>2</sub>SO<sub>4</sub></b> | <b>839.1</b>  | <b>50 mV s<sup>-1</sup></b> | <b>0.5 M CH<sub>3</sub>OH</b> | <b>This work</b> |
| Pt/CeO <sub>2</sub> /PANI                                    | 0.5 M H <sub>2</sub> SO <sub>4</sub>     | 350           | 100mV s <sup>-1</sup>       | 0.5 M CH <sub>3</sub> OH      | [1]              |
| Pt/CeO <sub>2</sub> -20 wt%                                  | 0.5 M H <sub>2</sub> SO <sub>4</sub>     | 104.4         | 50 mV s <sup>-1</sup>       | 0.5 M CH <sub>3</sub> OH      | [2]              |
| Pt <sub>1</sub> (CeO <sub>2</sub> ) <sub>0.5</sub> /MWCNTs-D | 0.5 M H <sub>2</sub> SO <sub>4</sub>     | 641.6         | 50 mV s <sup>-1</sup>       | 0.5 M CH <sub>3</sub> OH      | [3]              |
| Pt <sub>3</sub> Sn <sub>1</sub> -SnO <sub>2</sub> /CNTs-D    | 0.5 M H <sub>2</sub> SO <sub>4</sub>     | 361.2         | 50 mV s <sup>-1</sup>       | 0.5 M CH <sub>3</sub> OH      | [4]              |
| PtRu icosahedra                                              | 0.5 M H <sub>2</sub> SO <sub>4</sub>     | 74.4          | 50 mV s <sup>-1</sup>       | 0.5 M CH <sub>3</sub> OH      | [5]              |
| CB/PBI/PtRu                                                  | 0.5 M H <sub>2</sub> SO <sub>4</sub>     | 150           | 50 mV s <sup>-1</sup>       | 0.5 M CH <sub>3</sub> OH      | [6]              |
| Pt/TMPyP-graphene                                            | 0.5 M H <sub>2</sub> SO <sub>4</sub>     | 731.8         | 50 mV s <sup>-1</sup>       | 0.5 M CH <sub>3</sub> OH      | [7]              |
| PtCo/MWCNT                                                   | 0.5 M H <sub>2</sub> SO <sub>4</sub>     | 616.7         | 50 mV s <sup>-1</sup>       | 0.5 M CH <sub>3</sub> OH      | [8]              |
| Pt HOSs                                                      | 0.5 M H <sub>2</sub> SO <sub>4</sub>     | 460           | 50 mV s <sup>-1</sup>       | 0.5 M CH <sub>3</sub> OH      | [9]              |
| Pt/TSCuPcegraphene                                           | 0.5 M H <sub>2</sub> SO <sub>4</sub>     | 730.3         | 50 mV s <sup>-1</sup>       | 0.5 M CH <sub>3</sub> OH      | [10]             |
| Pt/ SiO <sub>2</sub> @NH <sub>2</sub> @PEDOT                 | 0.5 M H <sub>2</sub> SO <sub>4</sub>     | 507.2         | 50 mV s <sup>-1</sup>       | 0.5 M CH <sub>3</sub> OH      | [11]             |
| Pt/Co-N-S-MWCNTs                                             | 0.5 M H <sub>2</sub> SO <sub>4</sub>     | 704.9         | 50 mV s <sup>-1</sup>       | 0.5 M CH <sub>3</sub> OH      | [12]             |
| Pt/S-MWCNTs                                                  | 0.5 M H <sub>2</sub> SO <sub>4</sub>     | 803.9         | 50 mV s <sup>-1</sup>       | 0.5 M CH <sub>3</sub> OH      | [13]             |
| Pt/N-MWCNTs                                                  | 0.5 M H <sub>2</sub> SO <sub>4</sub>     | 539.4         | 50 mV s <sup>-1</sup>       | 0.5 M CH <sub>3</sub> OH      | [14]             |
| Pt/Ni-CB                                                     | 0.5 M H <sub>2</sub> SO <sub>4</sub>     | 572.2         | 50 mV s <sup>-1</sup>       | 0.5 M CH <sub>3</sub> OH      | [15]             |
| Pt/MnO <sub>x</sub> PEDOT/MWCNTs                             | 0.5 M H <sub>2</sub> SO <sub>4</sub>     | 585.1         | 50 mV s <sup>-1</sup>       | 0.5 M CH <sub>3</sub> OH      | [16]             |
| PtPdCu nanowires                                             | 0.5 M H <sub>2</sub> SO <sub>4</sub>     | 535.3         | 50 mV s <sup>-1</sup>       | 0.5 M CH <sub>3</sub> OH      | [17]             |
| PtV ANN/MWCNT                                                | 0.5 M H <sub>2</sub> SO <sub>4</sub>     | 711.1         | 50 mV s <sup>-1</sup>       | 0.5 M CH <sub>3</sub> OH      | [18]             |
| PtFeCu                                                       | 0.5 M H <sub>2</sub> SO <sub>4</sub>     | 622.0         | 50 mV s <sup>-1</sup>       | 0.5 M CH <sub>3</sub> OH      | [19]             |
| PtPdCu                                                       | 0.5 M H <sub>2</sub> SO <sub>4</sub>     | 520           | 50 mV s <sup>-1</sup>       | 0.5 M CH <sub>3</sub> OH      | [20]             |

## References

- Xu, H.; Wang, A. L.; Tong, Y. X.; Li, G.-R., Enhanced Catalytic Activity and Stability of Pt/CeO<sub>2</sub>/PANI Hybrid Hollow Nanorod Arrays for Methanol Electro-oxidation. *ACS Catal* **2016**, *6*, (8), 5198-5206.
- Jingjing Yang, Xiaoyao Tan, Yu Qian, Long Li, Yu Xue, Zhao Dai, Haitao Wang, Weili Qu, Yuanyuan Chu, Methanol oxidation on Pt-CeO<sub>2</sub>@C-N electrocatalysts prepared by the in-situ carbonization of polyvinylpyrrolidone. *J Appl Electrochem* **2016**, *46*, 779–789.
- Yang, P.; Devasenathipathy, R.; Xu, W.; Wang, Z.; Chen, D.-H.; Zhang, X.; Fan, Y.; Chen, W., Pt<sub>1</sub>(CeO<sub>2</sub>)<sub>0.5</sub> Nanoparticles Supported on Multiwalled Carbon Nanotubes for Methanol Electro-oxidation. *ACS Appl Nano Mater* **2021**, *4*, (10), 10584-10591.
- Yang, P.; Li, Y.; Chen, S.; Li, J.; Zhao, P.; Zhang, L.; Xie, Y.; Fei, J., One-step synthesis in deep eutectic solvents of Pt<sub>3</sub>Sn<sub>1</sub>-SnO<sub>2</sub> alloy nanopore on carbon nanotubes for boosting electro-catalytic methanol oxidation. *J Electroanal Chem* **2021**, *887*, 115164.
- Lin, Z.; Chen, W.; Jiang, Y.; Bian, T.; Zhang, H.; Wu, J.; Wang, Y.; Yang, D., Facile synthesis of Ru-decorated Pt cubes and icosahedra as highly active electrocatalysts for methanol oxidation. *Nanoscale* **2016**, *8*, (25), 12812-8.
- Zhao, L.; Sui, X. L.; Li, J. Z.; Zhang, J. J.; Zhang, L. M.; Huang, G. S.; Wang, Z. B., Supramolecular assembly promoted synthesis of three-dimensional nitrogen doped graphene frameworks as efficient electrocatalyst for oxygen reduction reaction and methanol electrooxidation. *Appl CatalB: Environ* **2018**, *231*, 224-233.
- Wang, R. X.; Fan, J. J.; Fan, Y. J.; Zhong, J. P.; Wang, L.; Sun, S. G.; Shen, X. C., Platinum nanoparticles on porphyrin functionalized graphene nanosheets as a superior catalyst for methanol electrooxidation. *Nanoscale* **2014**, *6*, (24), 14999-5007.
- Zhang, J.-M.; Sun, S.-N.; Li, Y.; Zhang, X.-J.; Zhang, P.-Y.; Fan, Y.-J., A strategy in deep eutectic solvents for carbon nanotube-supported PtCo nanocatalysts with enhanced performance toward methanol electrooxidation. *Inter J Hydrogen Energy* **2017**, *42*, (43), 26744-26751.
- Wang, X.; Sun, M.; Xiang, S.; Waqas, M.; Fan, Y.; Zhong, J.; Huang, K.; Chen, W.; Liu, L.; Yang, J., Template-free synthesis of platinum hollow-opened structures in deep-eutectic solvents and their enhanced performance for methanol electrooxidation. *Electrochim Acta* **2020**, *337*, 135742.
- Zhong, J. P.; Fan, Y. J.; Wang, H.; Wang, R. X.; Fan, L. L.; Shen, X. C.; Shi, Z. J., Copper phthalocyanine functionalization of graphene nanosheets as support for platinum nanoparticles and their enhanced performance toward methanol oxidation. *J Power Sources* **2013**, *242*, 208-215.
- Yang, B.; Huang, K.; Hu, S.; Wang, R.; Fan, Y.; Qi, J.; Rong, C.; Zeng, J.; Chen, W., Platinum nanoparticles anchored on aminated silica@PEDOT-PSS hybrid for enhanced methanol oxidation electrocatalysis. *Inter J Hydrog Energy* **2020**, *45*, (55), 30473-30483.
- Zhong, J.; Sun, M.; Xiang, S.; Fan, Y.; Waqas, M.; Huang, K.; Tang, Y.; Chen, W.; Yang, J., Sulfonated cobalt phthalocyanine-derived Co-N-S tridoped carbon nanotubes as platinum catalyst supports for highly efficient methanol electrooxidation. *Appl Surf Sci* **2020**, *511*, 145519.

13. Fan, J. J.; Fan, Y. J.; Wang, R. X.; Xiang, S.; Tang, H. G.; Sun, S. G., A novel strategy for the synthesis of sulfur-doped carbon nanotubes as a highly efficient Pt catalyst support toward the methanol oxidation reaction. *J Mater Chem A* **2017**, *5*, (36), 19467-19475.
14. Huang, K.; Zhong, J.; Huang, J.; Tang, H.; Fan, Y.; Waqas, M.; Yang, B.; Chen, W.; Yang, J., Fine platinum nanoparticles supported on polyindole-derived nitrogen-doped carbon nanotubes for efficiently catalyzing methanol electrooxidation. *Appl Surf Sci* **2020**, *501*, 144260.
15. Yang, F.; Yang, B.; Rani, K. K.; Wei, Y.; Peng, X.; Wang, L.; Liu, X.; Chen, D.-H.; Fan, Y.; Chen, W., Revealing the role of Ni<sup>2+</sup> ions in inducing the synthesis of porous carbon balls: A novel substrate to enhance the Pt catalytic activity towards methanol-oxidation. *Inter J Hydrog Energy* **2022**, *47*, (56), 23583-23592.
16. Wei, L.; Fan, Y. J.; Ma, J. H.; Tao, L. H.; Wang, R. X.; Zhong, J. P.; Wang, H., Highly dispersed Pt nanoparticles supported on manganese oxide–poly(3,4-ethylenedioxythiophene)–carbon nanotubes composite for enhanced methanol electrooxidation. *J Power Sources* **2013**, *238*, 157-164.
17. Wang, P.; Zhang, Y.; Shi, R.; Wang, Z., Trimetallic PtPdCu nanowires as an electrocatalyst for methanol and formic acid oxidation. *New J Chem* **2018**, *42*, (23), 19083-19089.
18. Zhang, J. M.; He, J. J.; Wang, X. Q.; Fan, Y. J.; Zhang, X. J.; Zhong, J. P.; Chen, W.; Sun, S. G., One-step synthesis in deep eutectic solvents of PtV alloy nanonetworks on carbon nanotubes with enhanced methanol electrooxidation performance. *Inter J Hydrogen Energ* **2019**, *44*, (54), 28709-28719.
19. Zhang, Y.; Shi, R.; Ren, J.; Dai, Y.; Yuan, Y.; Wang, Z., PtFeCu Concave Octahedron Nanocrystals as Electrocatalysts for the Methanol Oxidation Reaction. *Langmuir* **2019**, *35*, (51), 16752-16760.
20. Wang, P.; Zhang, Y.; Shi, R.; Wang, Z., Shape-Controlled Synthesis of Trimetallic PtPdCu Nanocrystals and Their Electrocatalytic Properties. *ACS Appl Energy Mater* **2019**, *2*, (4), 2515-2523.
